# Supplementary material for: Wet-chemical synthesis of Mg-doped hydroxyapatite nanoparticles by step reaction and ion exchange processes
Source: Royal Society of Chemistry journal article supplement (doi:10.1039/c3tb21315c), 2013-01-01
Supplement: c3tb21315c.pdf [file c3tb21315c.pdf]

## Supporting Information:

### **Wet-chemical synthesis of Mg-doped hydroxyapatite nanoparticles by step reaction and ion exchange processes**

Xiaoya Yuan,<sup>a</sup> Bangshang Zhu,<sup>\*a</sup> Gangsheng Tong,<sup>a</sup> Yue Su<sup>b</sup> and Xinyuan Zhu<sup>b</sup>

<sup>a</sup> *Instrumental Analysis Center, Shanghai Jiao Tong University, 800 Dongchuan Road, Shanghai 200240, People's Republic of China. \*Correspondence: E-mail: bshzhu@sjtu.edu.cn*

<sup>b</sup> *School of Chemistry and Chemical Engineering, State Key Laboratory of Metal Matrix Composites, Shanghai Jiao Tong University, 800 Dongchuan Road, Shanghai 200240, People's Republic of China.*

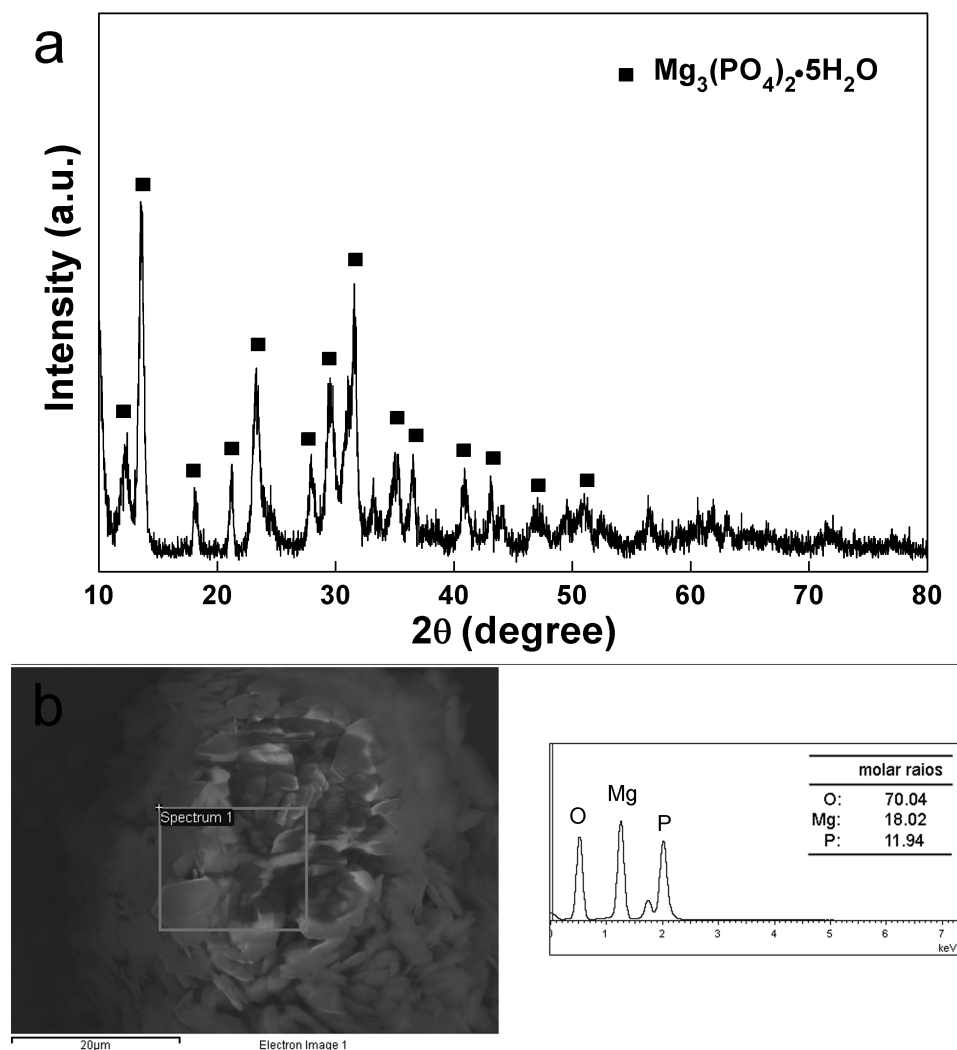

**Fig. S1** The XRD, SEM and EDX analysis of magnesium precursor particles. (a) The XRD pattern of magnesium precursor material. The detectable peaks in the picture match well with  $\text{Mg}_3(\text{PO}_4)_2 \cdot 5\text{H}_2\text{O}$ -derived peaks (PDF: 35-0329). (b) SEM accompanied by energy dispersive spectrometry (EDX) analysis of the elements in the magnesium precursor material, and O, Mg and P elements were found and their contents in the material were shown.

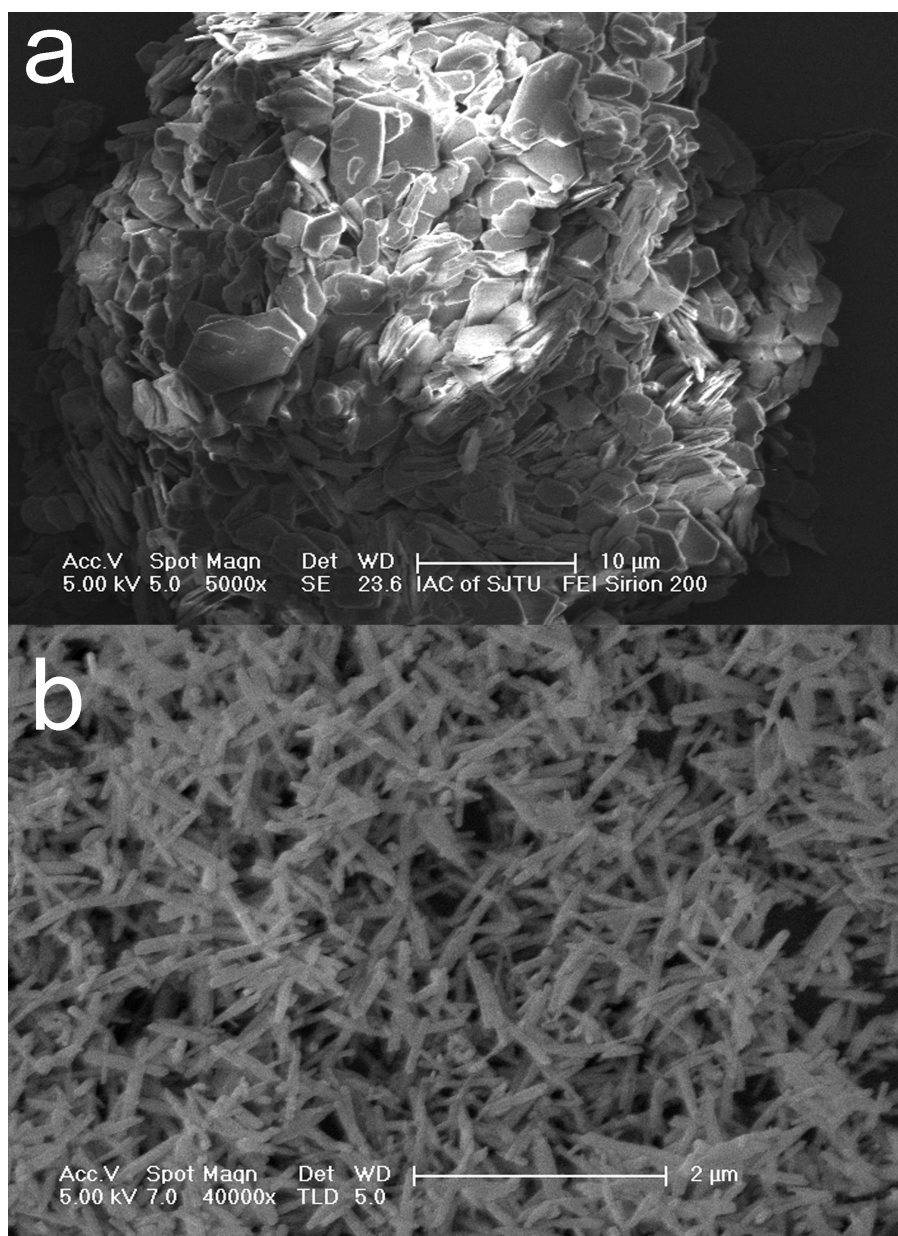

**Fig. S2** The SEM observation of the size and morphology of (a) magnesium phosphate and (b) hydroxyapatite particles.

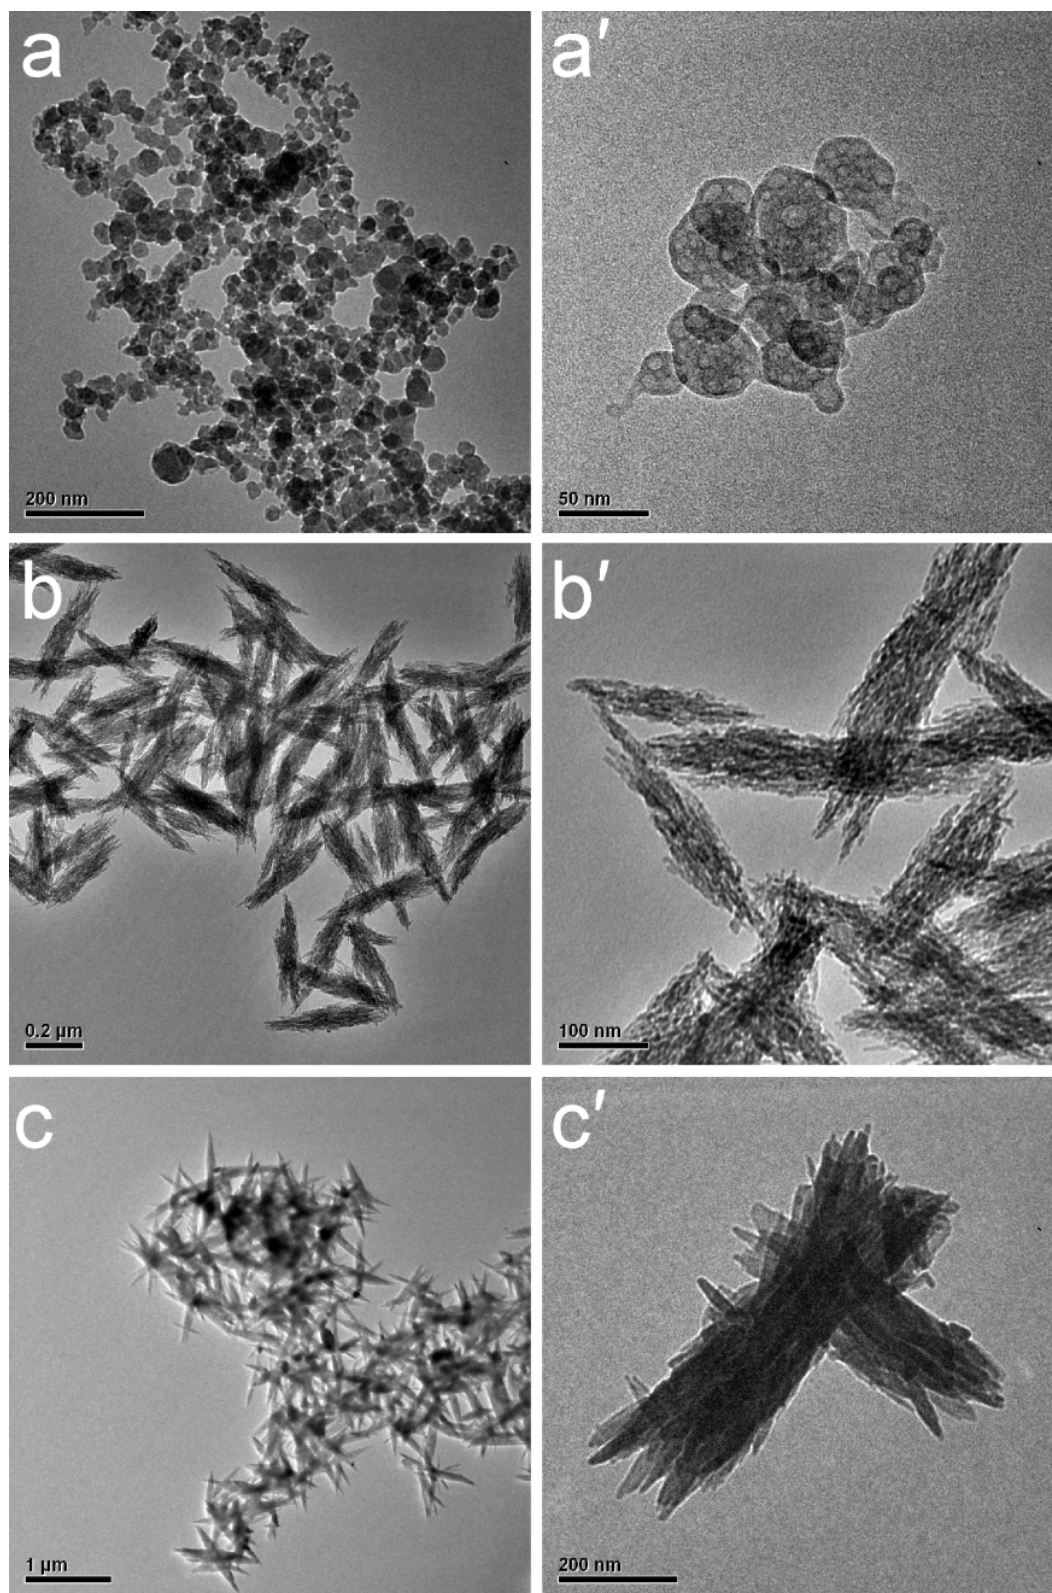

**Fig. S3** The TEM observation of the Mg-HA particles synthesized by  $\text{Ca}^{2+}$  and  $\text{Mg}^{2+}$  co-precipitation method at feeding ratios with (a) 2.5:1, (b) 7.5:1 and (c) 12.5:1. (a')-(c') demonstrate the detailed morphology at a high magnification corresponding to (a)-(c).

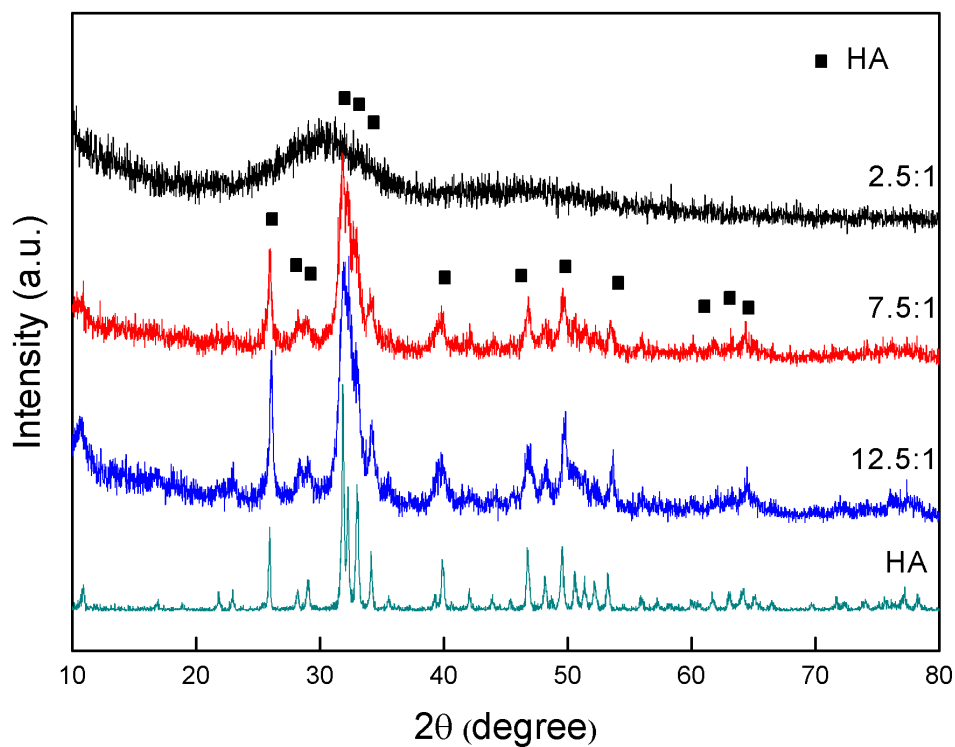

**Fig. S4** The XRD analysis of the Mg-HA nanoparticles synthesized by  $\text{Ca}^{2+}$  and  $\text{Mg}^{2+}$  co-precipitation method at feeding ratios with 2.5:1, 7.5:1 and 12.5:1 in comparison with HA.

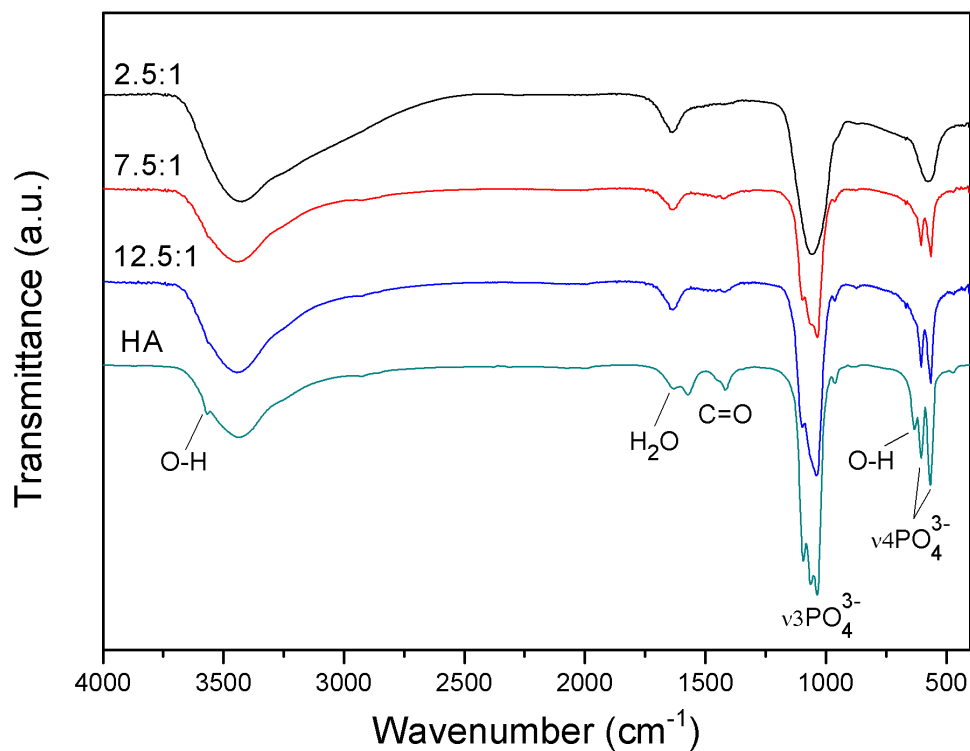

**Fig. S5** The FTIR patterns of the Mg-HA nanoparticles synthesized by  $\text{Ca}^{2+}$  and  $\text{Mg}^{2+}$  co-precipitation method at feeding ratios with 2.5:1, 7.5:1 and 12.5:1 in comparison

with HA.

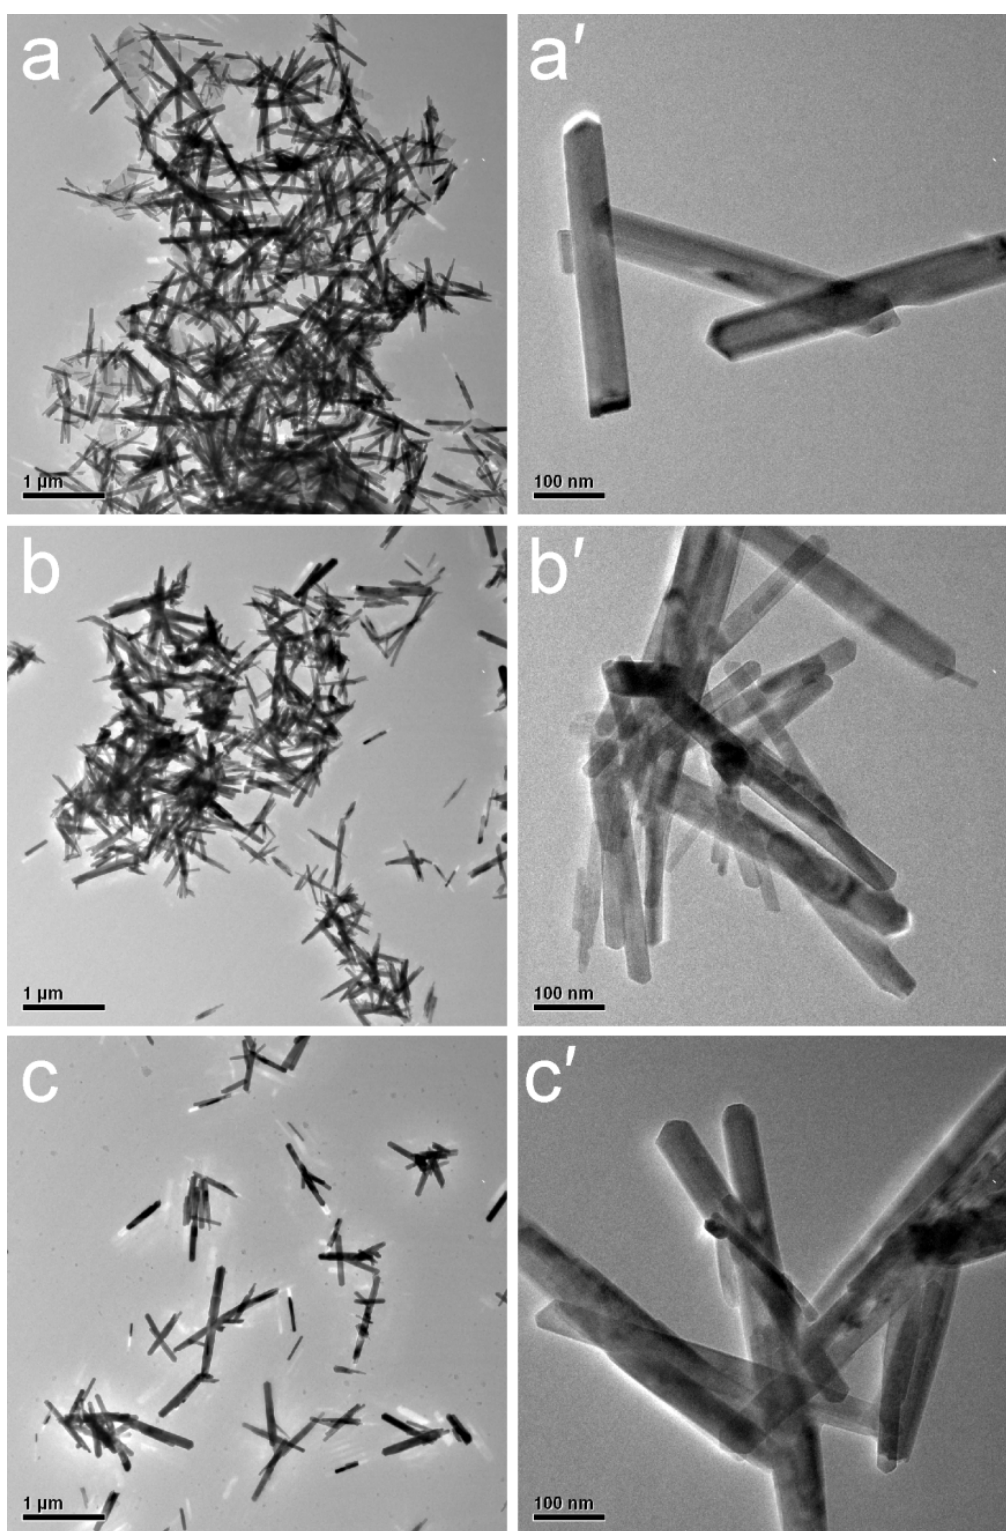

**Fig. S6** The TEM characterization of the Mg-HA particles synthesized at feeding ratios with (a) 2.5:1, (b) 7.5:1 and (c) 12.5:1 by  $\text{Mg}^{2+}$ -substituted  $\text{Ca}^{2+}$  ion exchange process. (a')-(c') show the detailed morphology at a high magnification corresponding to (a)-(c). All the samples indicate a rod-like appearance with relatively smooth surface. Both the size and

morphology are similar to that of HA particles.

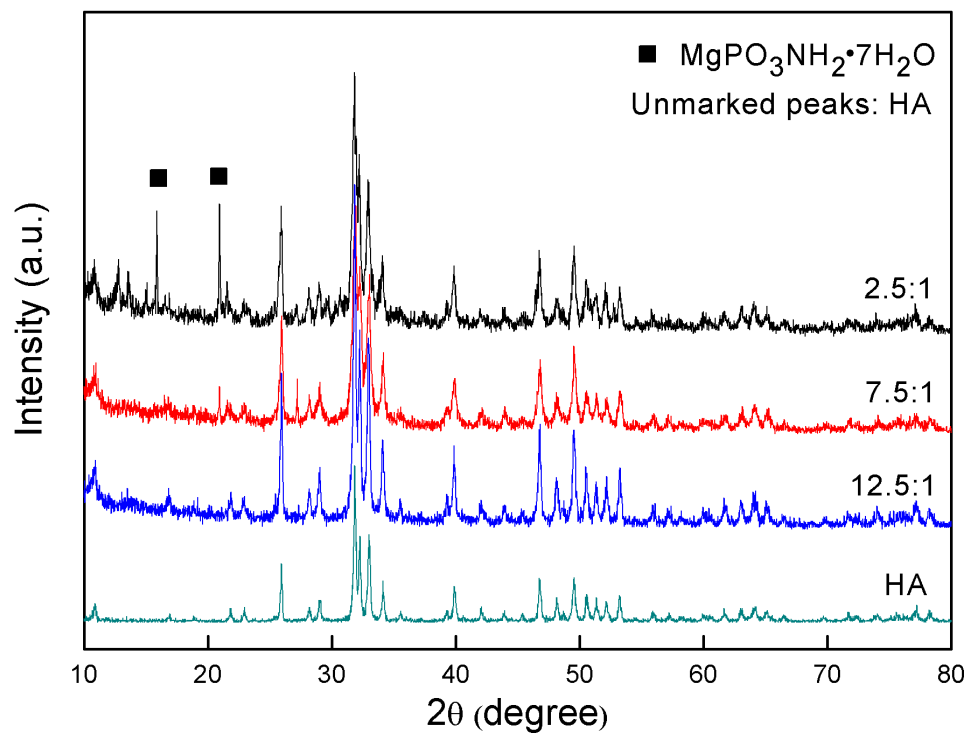

**Fig. S7** The XRD analysis of the Mg-HA nanoparticles synthesized by  $\text{Mg}^{2+}$ -substituted  $\text{Ca}^{2+}$  in HA by step reaction and ion exchange process with Ca/Mg feeding ratio of 2.5:1, 7.5:1 and 12.5:1 in comparison with HA.

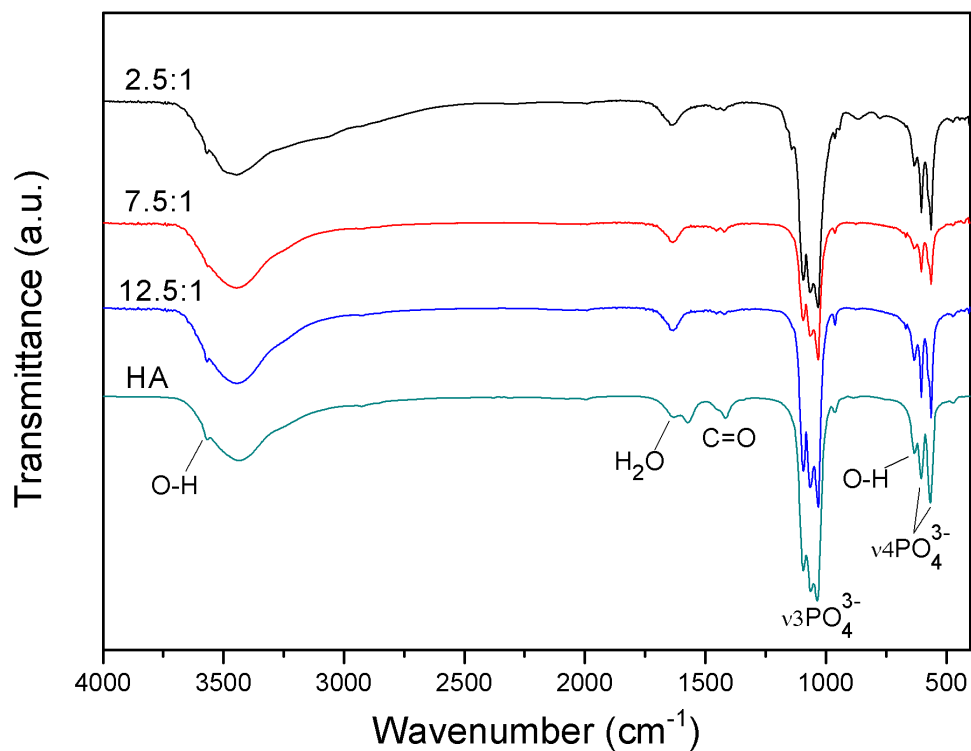

**Fig. S8** The FTIR analysis of the Mg-HA nanoparticles synthesized by Mg<sup>2+</sup>-substituted Ca<sup>2+</sup> in HA by step reaction and ion exchange process at Ca/Mg feeding ratio with 2.5:1, 7.5:1 and 12.5:1 in comparison with HA.



**Table S1** The ICP results of Ca, Mg and P content in the Mg-HA synthesized by *Method B* and *Method C*. \* The molar ratio of magnesium precursor is also shown.

| Sample<br>(Ca/Mg feeding ratio) | Measured wt% |       |       | (Ca+Mg)/P<br>molar ratio |
|---------------------------------|--------------|-------|-------|--------------------------|
|                                 | Ca           | Mg    | P     |                          |
| 2.5:1                           | 25.58        | 4.27  | 16.19 | 1.55                     |
| <i>Method B</i> 7.5:1           | 36.10        | 2.09  | 17.94 | 1.70                     |
| 12.5:1                          | 36.51        | 1.75  | 18.25 | 1.67                     |
| 2.5:1                           | 28.59        | 4.39  | 17.90 | 1.55                     |
| <i>Method C</i> 7.5:1           | 35.65        | 0.83  | 17.89 | 1.60                     |
| 12.5:1                          | 36.01        | 0.25  | 17.43 | 1.61                     |
| magnesium phosphate             | --           | 17.99 | 15.35 | 1.49                     |

\* *Method B*: Ca<sup>2+</sup> and Mg<sup>2+</sup> co-precipitation method;

*Method C*: Mg<sup>2+</sup>-substituted Ca<sup>2+</sup> in HA by step reaction and ion exchange process.

The content of the Ca, Mg and P in the Mg-HAs with Ca/Mg feeding molar ratio ranged from 2.5:1 to 12.5:1 were examined by ICP analysis, and the results are listed in Table S1. For the Mg-HA synthesized at feeding ratio of 2.5:1, the (Ca + Mg)/P molar ratios in the final materials are significantly lower than initial feeding ratio (1.67), regardless of the difference in synthesis. The (Ca+Mg)/P molar ratio of all the materials by *Method C* is lower than stoichiometry value (1.67) of HA.
